# Supplementary material
Source: publisher figshare collection journal article supplement (https://wiley.figshare.com/articles/dataset/_/3531365)
Supplement: Supplementary file 1 [file 1]

*Ecological Archives* E090-123-A6

**James Rosindell and Stephen J. Cornell. 2009. Species–area curves, neutral models, and long-distance dispersal. *Ecology* 90:1743–1750.**

# Species-Area Curves, Neutral Models and Long Distance Dispersal (Appendices)

James Rosindell and Stephen J. Cornell

February 8, 2009

## Appendix F Calculating median dispersal distance

To convert  $L$  into a median dispersal distance measured in metres, we first apply the procedure described in Appendix A to obtain integer coordinates  $x$  and  $y$  for the number of grid spaces across which dispersal has occurred in each axis. We then calculate  $\sqrt{x^2 + y^2}$  to obtain the true distance in grid spaces. To get the distance in metres we use the density  $\rho$  of trees in units of trees per square metre. The area of a single square in the discrete grid of our model is therefore given by  $\rho^{-1}$  and the width of a grid space is given by  $\rho^{-0.5}$ . We can therefore define the dispersal distance in metres by  $\sqrt{\frac{x^2 + y^2}{\rho}}$ . We calculate for 250,000 different instances of the random variables  $x$  and  $y$  then find the median of these 250,000 values. We found that increasing the number of trials did not yield a significantly different median dispersal distance and so 250,000 repeats is sufficient.
