# Supplementary material
Source: publisher figshare collection journal article supplement (https://wiley.figshare.com/articles/dataset/_/3531365)
Supplement: Supplementary file 2 [file 1 › appendix-F.htm]

Ecological Archives E090-123-A6


### *Ecological Archives* E090-123-A6

### **James Rosindell and Stephen J. Cornell. 2009. Species–area curves, neutral models, and long-distance dispersal. *Ecology* 90:1743–1750.**

Appendix F. Calculating median dispersal distance. Click here for a PDF file of the appendix.

---


[Back to E090-123]
